# Supplementary material for: Polymer removal from electronic grade single-walled carbon nanotubes after gel electrophoresis
Source: Royal Society of Chemistry journal article supplement (doi:10.1039/c3tc31242a), 2013-01-01
Supplement: c3tc31242a.pdf [file c3tc31242a.pdf]

# Supporting Information

## Polymer Removal from Electronic Grade Single- Walled Carbon Nanotubes after Gel Electrophoresis

*Sara Mesgari<sup>‡</sup>, Yin Fun Poon<sup>‡</sup>, Yilei Wang, Ya Xuan Thong, Jing Wang, Mary B. Chan-  
Park\**

School of Chemical & Biomedical Engineering, Nanyang Technological University, 62  
Nanyang Drive, Singapore 637459, Singapore

\* Mary Chan-Park (mbechan@ntu.edu.sg)

<sup>‡</sup> These authors contribute equally to this manuscript

**Agarose Gel Electrophoresis (AGE) procedure:**

**Preparation of SWNTs solution:** P2 nanotubes were dispersed in an aqueous solution containing 2 wt % of CS-A as dispersant using probe sonication (SONICS, VCX-130) at 100 W in a water-ice bath for 3 h and then centrifuged (Sartorius, SIGMA@3K30) at 50,000 g for 1 h to remove SWNT bundles. The supernatant was then collected for use in AGE.

**Gel Electrophoresis:** the agarose gel was made by adding 1 wt % agarose to 0.2 wt % CS-A in 2× transport buffer (TB) buffer solution (50 mM tris hydroxymethyl aminomethane, 48.5 mM boric acid, pH 8.2). The agarose gel solution was then melted by heating in a microwave oven and used to fill about 2/3 of the sample container of the gel electrophoresis apparatus (a 0.3 cm wide space sandwiched by 2 glass plates (20 cm by 20 cm)). The sample was then cooled at room temperature to form the gel. The remaining 1/3 of the sample container was filled with a mixture of SWNT solution and agarose solution prepared by mixing about 20 mL of the previously prepared SWNT solution with an equal amount of 2 wt % agarose solution and then melting the resultant mixture by heating in a microwave oven. The sample was next placed in the gel electrophoresis apparatus (PROTEAN II XI, Bio Rad Laboratories, Singapore) filled with the 2× TB buffer solution and was subjected to electric field at 200 V for about 4 h.

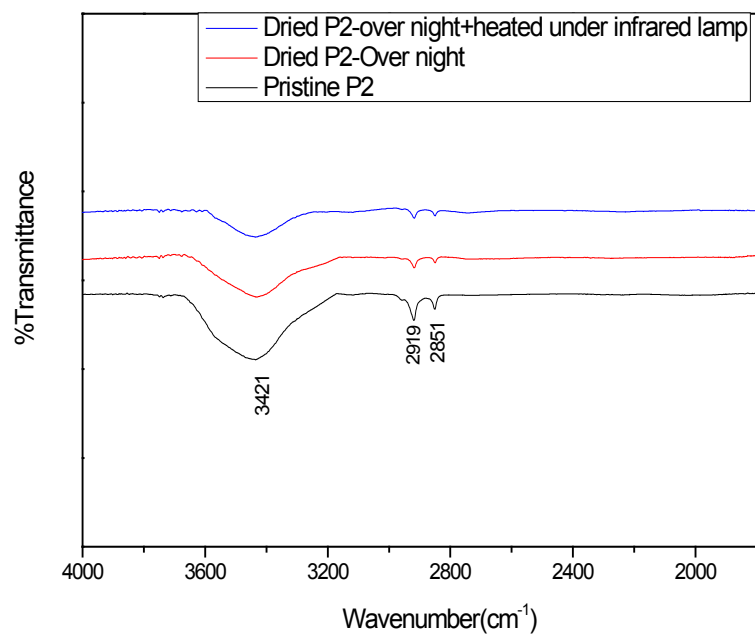

**Figure S1.** FTIR spectra of pristine P2 in different conditions after drying over night and heating under infrared lamp.

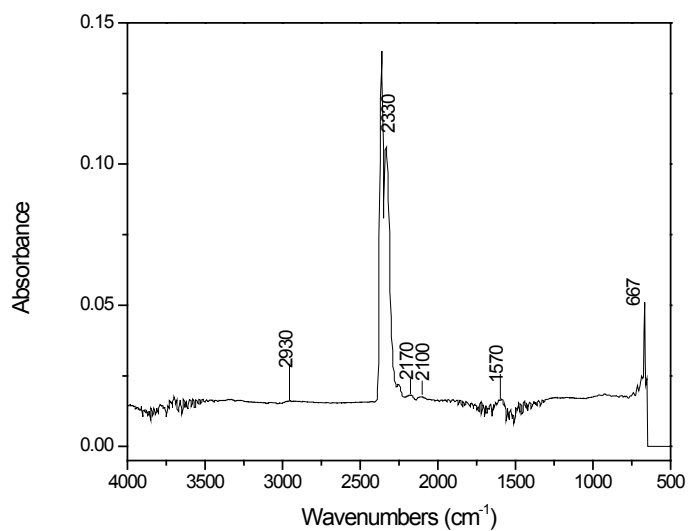

(a)

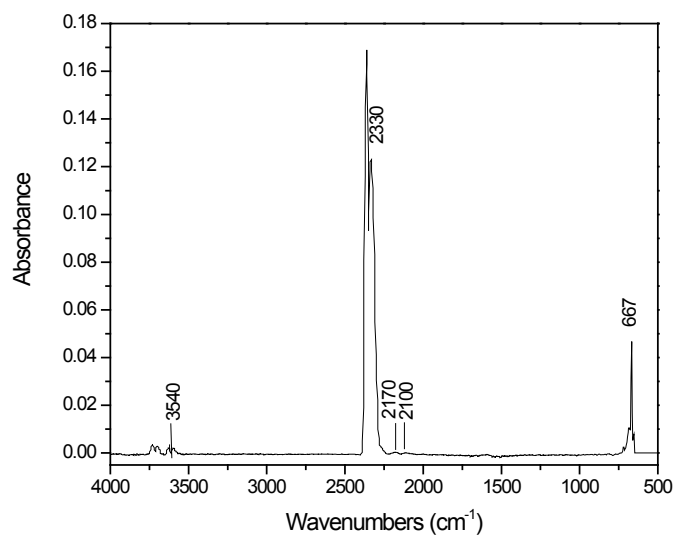

(b)

**Figure S2.** Enlarged FTIR of the gases evolved from (a) *a*-SWNTs-3d at 436°C and (b) *b*-SWNTs at 330°C.

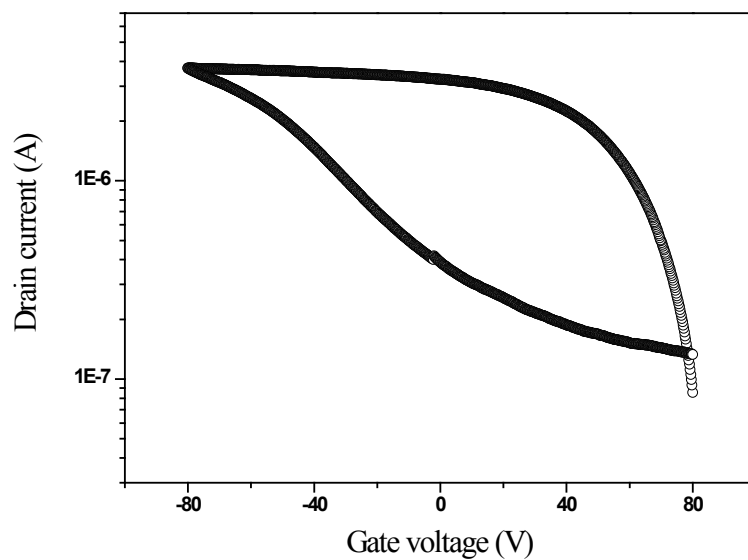

(a)

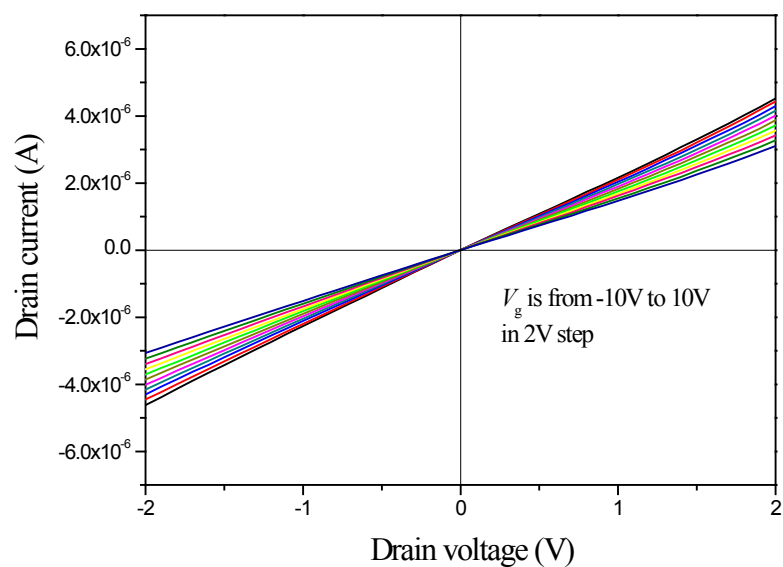

(b)

**Figure S3.** (a) Drain current ( $I_d$ ) versus gate voltage ( $V_g$ ) plot of a representative FET (with on/off ratio of about  $4.3 \times 10^1$ ) made with *p*-SWNTs at  $V_{ds}=0.3$ V. (b) Typical output

characteristic (drain current ( $I_d$ ) versus drain voltage ( $V_d$ )) of a representative FET made with *p*-SWNTs at gate voltages from -10V to 10V in 2V steps.

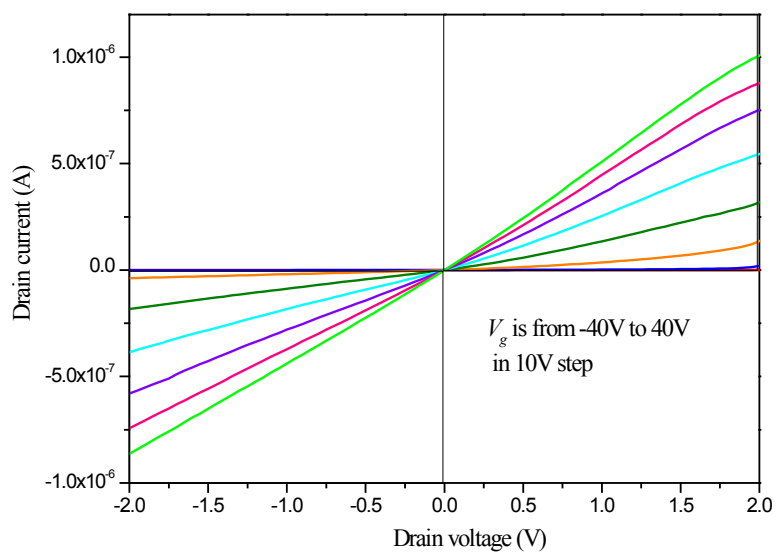

**Figure S4.** Typical output characteristic (drain current ( $I_d$ ) versus drain voltage ( $V_d$ )) of a representative FET made with annealed *b*-SWNTs at gate voltages from -40V to 40V in 10V steps.
